# Supplementary material for: Response and oil degradation activities of a northeast Atlantic bacterial community to biogenic and synthetic surfactants
Source: Microbiome. 2021 Sep 21;9:191. doi: 10.1186/s40168-021-01143-5 (PMC8456599; doi:10.1186/s40168-021-01143-5)
Supplement: Supplementary file 3 — Additional file 2: Supplementary File 1. Top 25 taxa relative abundance. Relative abundance of top 25 taxa in all treatments (including replicates) over time. [file 40168_2021_1143_MOESM3_ESM.xlsx]

## Sheet: Sheet1
Taxa (Family.Genus)	Distinct ASVs	BEWAF Day 0					BEWAF Day 3					BEWAF Day 7					BEWAF Day 14					BEWAF Day 28					CEWAF Day 0					CEWAF Day 3					CEWAF Day 7					CEWAF Day 14					CEWAF Day 28
		R1	R2	R3	Average *	SD*	R1	R2	R3	Average	SD	R1	R2	R3	Average	SD	R1	R2	R3	Average	SD	R1	R2	R3	Average	SD	R1	R2	R3	Average	SD	R1	R2	R3	Average	SD	R1	R2	R3	Average	SD	R1	R2	R3	Average	SD	R1	R2	R3
Colwelliaceae.Colwellia	95	0.130688	0.0786259	0.11277	10.7361	2.64492	0.382415	0.353904	0.322715	35.3011	2.98603	0.259341	0.235865	0.277721	25.7642	2.09793	0.0101292	0.0268239	0.0161255	1.76929	0.845698	0.00602259	0.00608202	0.00111834	0.440765	0.284878	0.241408	0.230309	0.172351	21.4689	3.70833	0.361617	0.39043	0.292061	34.8036	5.05714	0.242733	0.25456	0.0727311	19.0008	10.1737	0.0339217	0.0342761	0.0325595	3.35858	0.0906287	0.0226584	0.00950745	0.00487284
Saccharospirillaceae.Oleispira	48	0.084505	0.071978	0.0927999	8.30943	1.04824	0.261649	0.293477	0.285922	28.0349	1.66295	0.244671	0.269771	0.212949	24.2464	2.84751	0.087773	0.238832	0.115033	14.7213	8.05066	0.0377305	0.133744	0.0177726	6.30823	6.20031	0.147695	0.160373	0.115633	14.1234	2.30589	0.293176	0.259941	0.297924	28.3681	2.06954	0.149232	0.147717	0.0842545	12.7068	3.70852	0.0590322	0.0523873	0.0533411	5.49202	0.359286	0.0188088	0.00705578	0.00968815
Rhodobacteraceae.Pseudophaeobacter	10	0.0025273	0.00485538	0.00305665	0.347978	0.122036	0.00467896	0.00495576	0.005792	0.514224	0.0579478	0.0112137	0.0104197	0.0118042	1.11458	0.0694748	0.0666721	0.0213603	0.0372098	4.17474	2.29942	0.028887	0.0202936	0.0909082	4.66962	3.8529	0.00183374	0.00262033	0.00292988	0.246132	0.0565104	0.0136616	0.0132762	0.0190169	1.53183	0.320892	0.102487	0.102403	0.229365	14.4752	7.32769	0.408496	0.391341	0.46954	42.3126	4.1101	0.294519	0.635107	0.554287
Rhodobacteraceae.Sedimentitalea	14	0.0579417	0.0810623	0.0630757	6.73599	1.21411	0.0385629	0.039237	0.044723	4.0841	0.337882	0.0691551	0.0745543	0.0746809	7.27968	0.31544	0.0885332	0.0950083	0.0850638	8.95351	0.50474	0.0251854	0.0362416	0.014337	2.52546	1.09525	0.066364	0.0841729	0.0738135	7.47835	0.894401	0.0704062	0.0650927	0.101386	7.89617	1.9601	0.144012	0.137825	0.20545	16.2429	3.73855	0.102206	0.0995649	0.0818905	9.45538	1.1046	0.0769706	0.036968	0.0466412
Micavibrionaceae.uncultured	22	0.0981923	0.123664	0.0828556	10.1571	2.06131	0.0464811	0.046133	0.040263	4.42924	0.34939	0.10572	0.097719	0.114502	10.598	0.839449	0.234544	0.123542	0.170918	17.6335	5.5699	0.140579	0.132379	0.148881	14.0613	0.825088	0.0613692	0.0675821	0.0544653	6.11389	0.656146	0.0848757	0.0947906	0.0849302	8.81988	0.570865	0.0396649	0.0373999	0.0295712	3.55453	0.529621	0.0232713	0.0235335	0.0273767	2.47272	0.22983	0.0311154	0.0144783	0.0225564
Rhodobacteraceae.Amylibacter	6	0.0158289	0.0188646	0.0161255	1.69397	0.167365	0.0101035	0.0110219	0.0122805	1.11353	0.109294	0.0147905	0.0157347	0.00823793	1.2921	0.408307	0.00468451	0.00514442	0.0423726	1.74005	2.16277	0.0030351	0.00155506	0.0303464	1.16455	1.62123	0.00548376	0.00973867	0.00627436	0.716559	0.226314	0.00238747	0.00176848	0.00270707	0.228767	0.0477188	0.000965401	0	0.00567955	0.221498	0.303898	0.00117295	0.000611922	0.000970984	0.0918618	0.0284156	0.000219403	0.000675656	0.000714902
Vibrionaceae.Vibrio	9	0.00119714	0.00111378	0.00199701	0.143598	0.0487654	0.00524455	0.00176491	0.00564537	0.421828	0.213411	0.00398763	0.0027461	0.00238189	0.303854	0.0841865	0.000657476	0.00202889	0.000675615	0.112066	0.0786603	0.000249949	0.000311012	0.000171278	0.024408	0.0070052	0.00532658	0.00255027	0.00175516	0.321067	0.187506	0.0222348	0.0216134	0.0218026	2.18836	0.0318544	0.0456599	0.0414053	0.0390528	4.20393	0.334887	0.0120673	0.0146521	0.00832272	1.16807	0.318237	0.00871629	0.00408289	0.00267883
Cycloclasticaceae.Cycloclasticus	17	0.000172921	0.000400265	0.000339628	0.0304271	0.0117724	0	0.000280515	0.000305485	0.0195333	0.0169624	0.000628353	0.000453992	0.000407948	0.0496764	0.0116261	0.00591728	0.00623105	0.000968807	0.437238	0.295175	0.156956	0.0894506	0.000574284	8.23271	7.8434	0	0.000490436	0.000428425	0.0306287	0.0267059	0	0	0	0	0	0	0.000482579	0	0.016086	0.0278617	0	0.000212473	0.000327865	0.0180113	0.0166311	0.000458752	0.000318524	0
Clade.Ia	28	0.0689288	0.0671226	0.0650455	6.70323	0.194323	0.00105405	0.00111037	0.00144189	0.12021	0.0209561	0.0017038	0.00126232	0.00323727	0.20678	0.103657	0.00176697	0.000478727	0.000994302	0.108	0.0648381	0.000880774	0.00090712	0.00255909	0.144899	0.0961462	0.01584	0.0140685	0.0104342	1.34476	0.275587	0	0	0	0	0	5.95926e-05	0	0	0.00198642	0.00344058	0	0.000135983	0	0.00453276	0.00785097	0	0	0
Alcanivoracaceae.Alcanivorax	17	0.00699663	0.00654345	0.00353213	0.569074	0.188309	0.00186387	0.00158958	0.00122194	0.155847	0.0322095	0.0048939	0.0035212	0.00327675	0.389729	0.087171	0.0158719	0.0109499	0.00419391	1.03386	0.586293	0.0526679	0.0481637	0.0160397	3.89571	1.99745	0.00730003	0.0118405	0.0108074	0.998265	0.237995	0.00415998	0.00354959	0.00430211	0.40039	0.0399805	0.017997	0.0206544	0.035814	2.48218	0.961184	0.0447973	0.0532882	0.0452579	4.77811	0.477483	0.0543921	0.0316111	0.0411028
Spongiibacteraceae.Zhongshania	11	0.00732917	0.00452473	0.00919712	0.701701	0.235179	0.00794396	0.00679079	0.00823588	0.765688	0.0764121	0.0120112	0.0125567	0.00959337	1.13871	0.157719	0.00309219	0.00746966	0.00520096	0.525427	0.218922	0.0104265	0.00971914	0.00239789	0.75145	0.44452	0.0089766	0.00791705	0.00715885	0.80175	0.0913028	0.00543812	0.00653075	0.0056051	0.585799	0.0588574	0.0238132	0.0292443	0.00943463	2.08307	1.02361		0.0086519	0.00581329	0.72326	0.20072	0.0240945	0.0105016	0.0022844
Flavobacteriaceae.Tenacibaculum	12	0.0244217	0.030803	0.02266	2.59615	0.428432	0.000706986	0.00140257	0	0.0703187	0.0701295	0.000471265	0	0.000447427	0.0306231	0.0265471	0.000174642	0	0	0.0058214	0.010083	0	0.000155506	0	0.00518354	0.00897816	0.0146525	0.0206264	0.0164598	1.72462	0.30636	0	0.000277904	0	0.00926347	0.0160448	0	0	0	0	0	0	0	0	0	0	0	0	0
Rhodobacteraceae.Shimia	4	0.0111467	0.0124778	0.0102296	1.12847	0.113045	0.00493605	0.00572718	0.00653739	0.573354	0.0800687	0.00855527	0.0142066	0.015173	1.2645	0.35746	0.0167348	0.0177813	0.0124798	1.56653	0.280793	0.00326124	0.00660901	0.00109819	0.365615	0.277655	0.0130807	0.0153437	0.0136682	1.40308	0.117427	0.0121303	0.00929716	0.0154449	1.22908	0.307703	0.0173534	0.0150565	0.0383252	2.35784	1.28227	0.0178476	0.0154	0.0199493	1.77323	0.227682	0.0175323	0.00551142	0.0241095
Flavobacteriaceae.Ulvibacter	24	0.0419399	0.0537747	0.0365847	4.40998	0.879616	0.000591298	0.000642846	0.000892017	0.070872	0.0160818	0.00157088	0.00167202	0.00197394	0.173895	0.02097	0.00114031	0.00189211	0.000586383	0.120627	0.0655358	0.000416582	0.000406044	0.000594434	0.0472354	0.0105856	0.0219525	0.0188888	0.0098676	1.6903	0.628242	0.000144695	0.000101056	6.7396e-05	0.0104382	0.00387567	0.000166859	0	0.000258161	0.0141674	0.0130911	0.000563016	0.00039095	0.000176543	0.0376836	0.0193623	0.00203447	0.000569482	0.000188997
Colwelliaceae.Thalassotalea	21	0.0110403	0.00802269	0.0153376	1.14669	0.367606	0.00710843	0.00603107	0.00631744	0.648564	0.0558029	0.00515975	0.00414129	0.00476378	0.468827	0.051341	0.000195188	0.000501524	0.000420666	0.0372459	0.0158755	0	0	0	0	0	0.0328152	0.0206824	0.0198458	2.44478	0.725847	0.0254663	0.0224597	0.0274077	2.51113	0.249305	0.0125264	0.012354	0.00938769	1.14227	0.176447	0.00569584	0.00613622	0.00493058	0.558755	0.0610072	0.00277246	0.00166018	0.00104359
Pseudomonadaceae.Pseudomonas	40	0.000146317	0.000295848	0.000679256	0.0373807	0.0274889	0.00138826	0.00161296	0.00162518	0.154214	0.0133396	0.0110083	0.00780644	0.00773786	0.885086	0.186869	0.00203407	0.00813836	0.0138565	0.800964	0.591226	0.00266613	0.00526993	0.00127955	0.307187	0.20259	0.000104785	0.000364324	0	0.015637	0.018756	0.00334005	0.0060381	0.00667221	0.535012	0.176941	0.0242065	0.024708	0.0290784	2.59976	0.267974	0.0660886	0.0780371	0.0375531	6.05596	2.08006	0.0711066	0.0325087	0.00715724
Pseudohongiellaceae.Pseudohongiella	20	0.000465556	0.000591695	0.00157587	0.0877708	0.0607909	0	0	0	0	0	0	0	0	0	0	0.000339011	0.000106384	0	0.0148465	0.0173379	0.0327315	0.00441465	0.00115864	1.27683	1.73651	0	0	0	0	0	0	0	0	0	0	0	0	0	0	0	0	0	0	0	0	0.00013962	0	0
Rhodobacteraceae.Sulfitobacter	16	0.0105482	0.0192823	0.0141013	1.46439	0.439228	0.00218523	0.00219737	0.00329924	0.256061	0.06397	0.00484557	0.00837117	0.0103435	0.78534	0.278528	0.0207413	0.00839672	0.0101342	1.30908	0.668229	0.00677244	0.0079049	0.0174502	1.07092	0.586528	0.0114914	0.0131297	0.0151607	1.32606	0.183814	0.00185692	0.00166742	0.00231393	0.194609	0.033235	0.00423108	0.00361934	0.008003	0.528447	0.23741	0.00516098	0.00844793	0.00900367	0.753752	0.207682	0.00630286	0.0152505	0.0345865
Porticoccaceae.C1.B045	5	0	0	0	0	0	0	0	0	0	0	0	0	0	0	0	0	0	0.00015297	0.00509898	0.0088317	0	0	0	0	0	0	0	0	0	0	0	0	0	0	0	0	0	0	0	0	0	0	0	0	0	0	0	0
Porticoccaceae.SAR92.clade	13	0.0246611	0.022206	0.0288955	2.52542	0.338398	0.00277653	0.0024545	0.00301819	0.274974	0.0282798	0.000676688	0.000354335	0.000592183	0.0541069	0.0167145	0.000154096	0.000227965	0.000165717	0.0182593	0.00397211	0	0	0	0	0	0.00691582	0.0113081	0.00834738	0.885709	0.224004	0.000229101	0.000151584	0.000224653	0.0201779	0.00435273	0.000393311	0	0.000281631	0.0224981	0.0202683	0	5.94924e-05	0	0.00198308	0.0034348	0	0	0
SUP05.cluster	5	0.0130356	0.0198392	0.0229181	1.85976	0.50569	0	0.000268827	0.000293266	0.0187364	0.0162722	0	0	0.000210554	0.00701847	0.0121563	6.16383e-05	0	0	0.00205461	0.00355869	0	0	0	0	0	0.0038072	0.00121908	0.00265347	0.255992	0.129659	0	0	0	0	0	0	0	0.000258161	0.00860538	0.014905	0	0	0	0	0	0	5.79134e-05	0
Alteromonadaceae.Paraglaciecola	10	0.00901848	0.00482058	0.00929222	0.771042	0.250642	0.00151681	0.00287528	0.00180847	0.206685	0.0715143	0.0181135	0.015624	0.0151862	1.63079	0.157894	0.00304083	0.0188223	0.0139967	1.19533	0.808676	0.000964091	0.00446648	0.00283112	0.27539	0.175247	0.0110723	0.0103692	0.00673042	0.939065	0.233049	0.000554665	0	0	0.0184888	0.0320236	0	0	0.00117346	0.0391154	0.0677498	0.000300275	0.000331458	0.00118536	0.0605697	0.0502243	0.000718047	0.000183392	0.000279387
Bacteriovoracaceae.Peredibacter	17	0.00223467	0.00314991	0.00279853	0.27277	0.0461713	0.000437046	0.000455836	0.000219949	0.0370944	0.0131102	0.0174972	0.0246484	0.0156073	1.9251	0.476888	0.00221898	0.0065654	0.00215432	0.364623	0.252828	0.00289227	0.0250019	0.00447337	1.07892	1.2334	0.00178135	0.00141526	0.00158932	0.159531	0.0183118	0	0	0	0	0	0	0	0	0	0	0	0	0	0	0	0	0	0
Hyphomonadaceae.Hyphomonas	9	0	0	0.000366798	0.0122266	0.0211771	0	0.00024545	0	0.00818168	0.0141711	0.000350428	0.00052043	0.000197394	0.0356084	0.0161592	0.00654394	0.00360185	0.00713858	0.576146	0.189376	0.0075937	0.00949452	0.0182058	1.17647	0.565857	0.000750961	0	0.00082921	0.0526724	0.0457831	0	0	0.000202188	0.0067396	0.0116733	0.00204999	0.00144774	0.00401324	0.250365	0.134157	0.019227	0.0208394	0.0156618	1.85761	0.264942	0.0560675	0.0328948	0.0700933
CHAB-XI-27.uncultured organisms	2	0	0	0.000122266	0.00407553	0.00705903	0	0	0	0	0	3.62511e-05	0	0.000236873	0.00910415	0.0127588	0.00169505	0.000539518	0.00257499	0.160319	0.102084	0.00233286	0.00173649	0.00909787	0.438907	0.408883	0	0	0	0	0	0	0	0	0	0	0	0	0	0	0	0.000225206	0.00445343	0	0.155955	0.250871	0.00478698	0.0365916	0
Others		0.377033	0.365981	0.383644	37.5553	0.892389	0.218356	0.215821	0.247443	22.7207	1.7571	0.203599	0.198051	0.208738	20.3463	0.534471	0.425284	0.395558	0.457583	42.6142	3.10214	0.477749	0.455694	0.618706	51.7383	8.84384	0.319979	0.294991	0.448796	35.4589	8.25374	0.0983203	0.103014	0.117932	10.6422	1.02403	0.172449	0.171122	0.197869	18.048	1.50737	0.185861	0.187248	0.186139	18.6416	0.0734038	0.306586	0.124466	0.177715
* All Average and SD columns are multiplied by 100 to turn in %
[truncated: 102 more columns]
